# Supplementary material for: Pressurized Hot Water Extraction and Bio-Hydrogels Formulation with Aristotelia chilensis [Mol.] Stuntz Leaves
Source: MDPI journal article supplement (doi:10.3390/molecules26216402), 2021-10-23
Supplement: s1 [file s1]

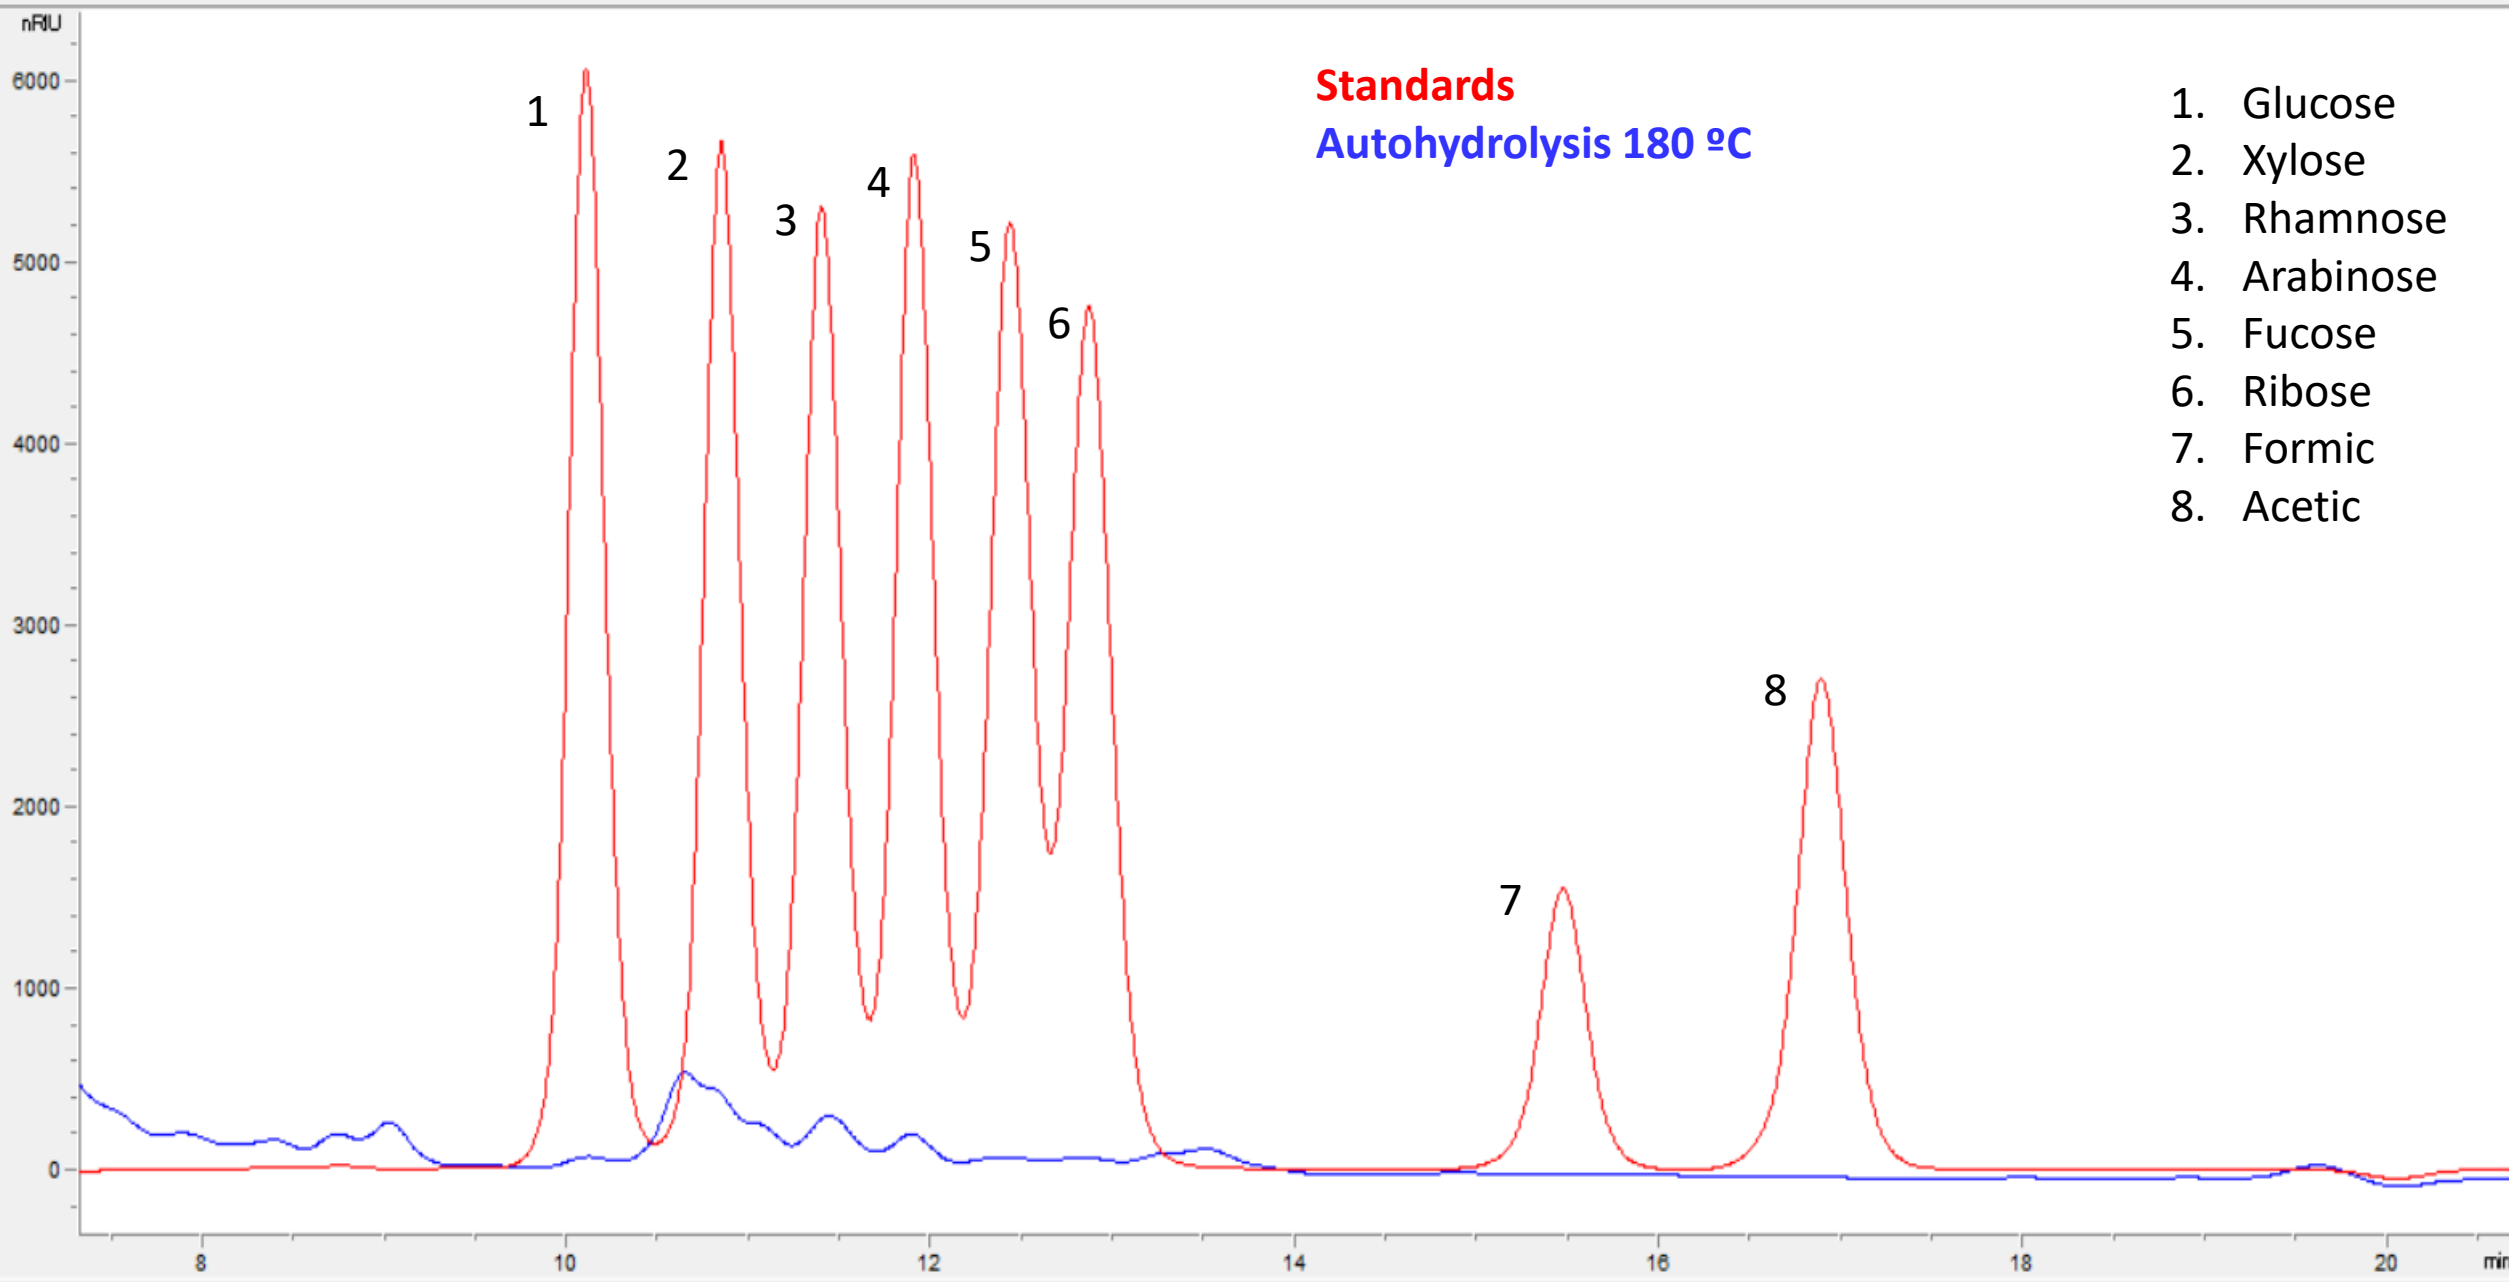

**Standards**

**Autohydrolysis 180 °C**

1. Glucose
2. Xylose
3. Rhamnose
4. Arabinose
5. Fucose
6. Ribose
7. Formic
8. Acetic

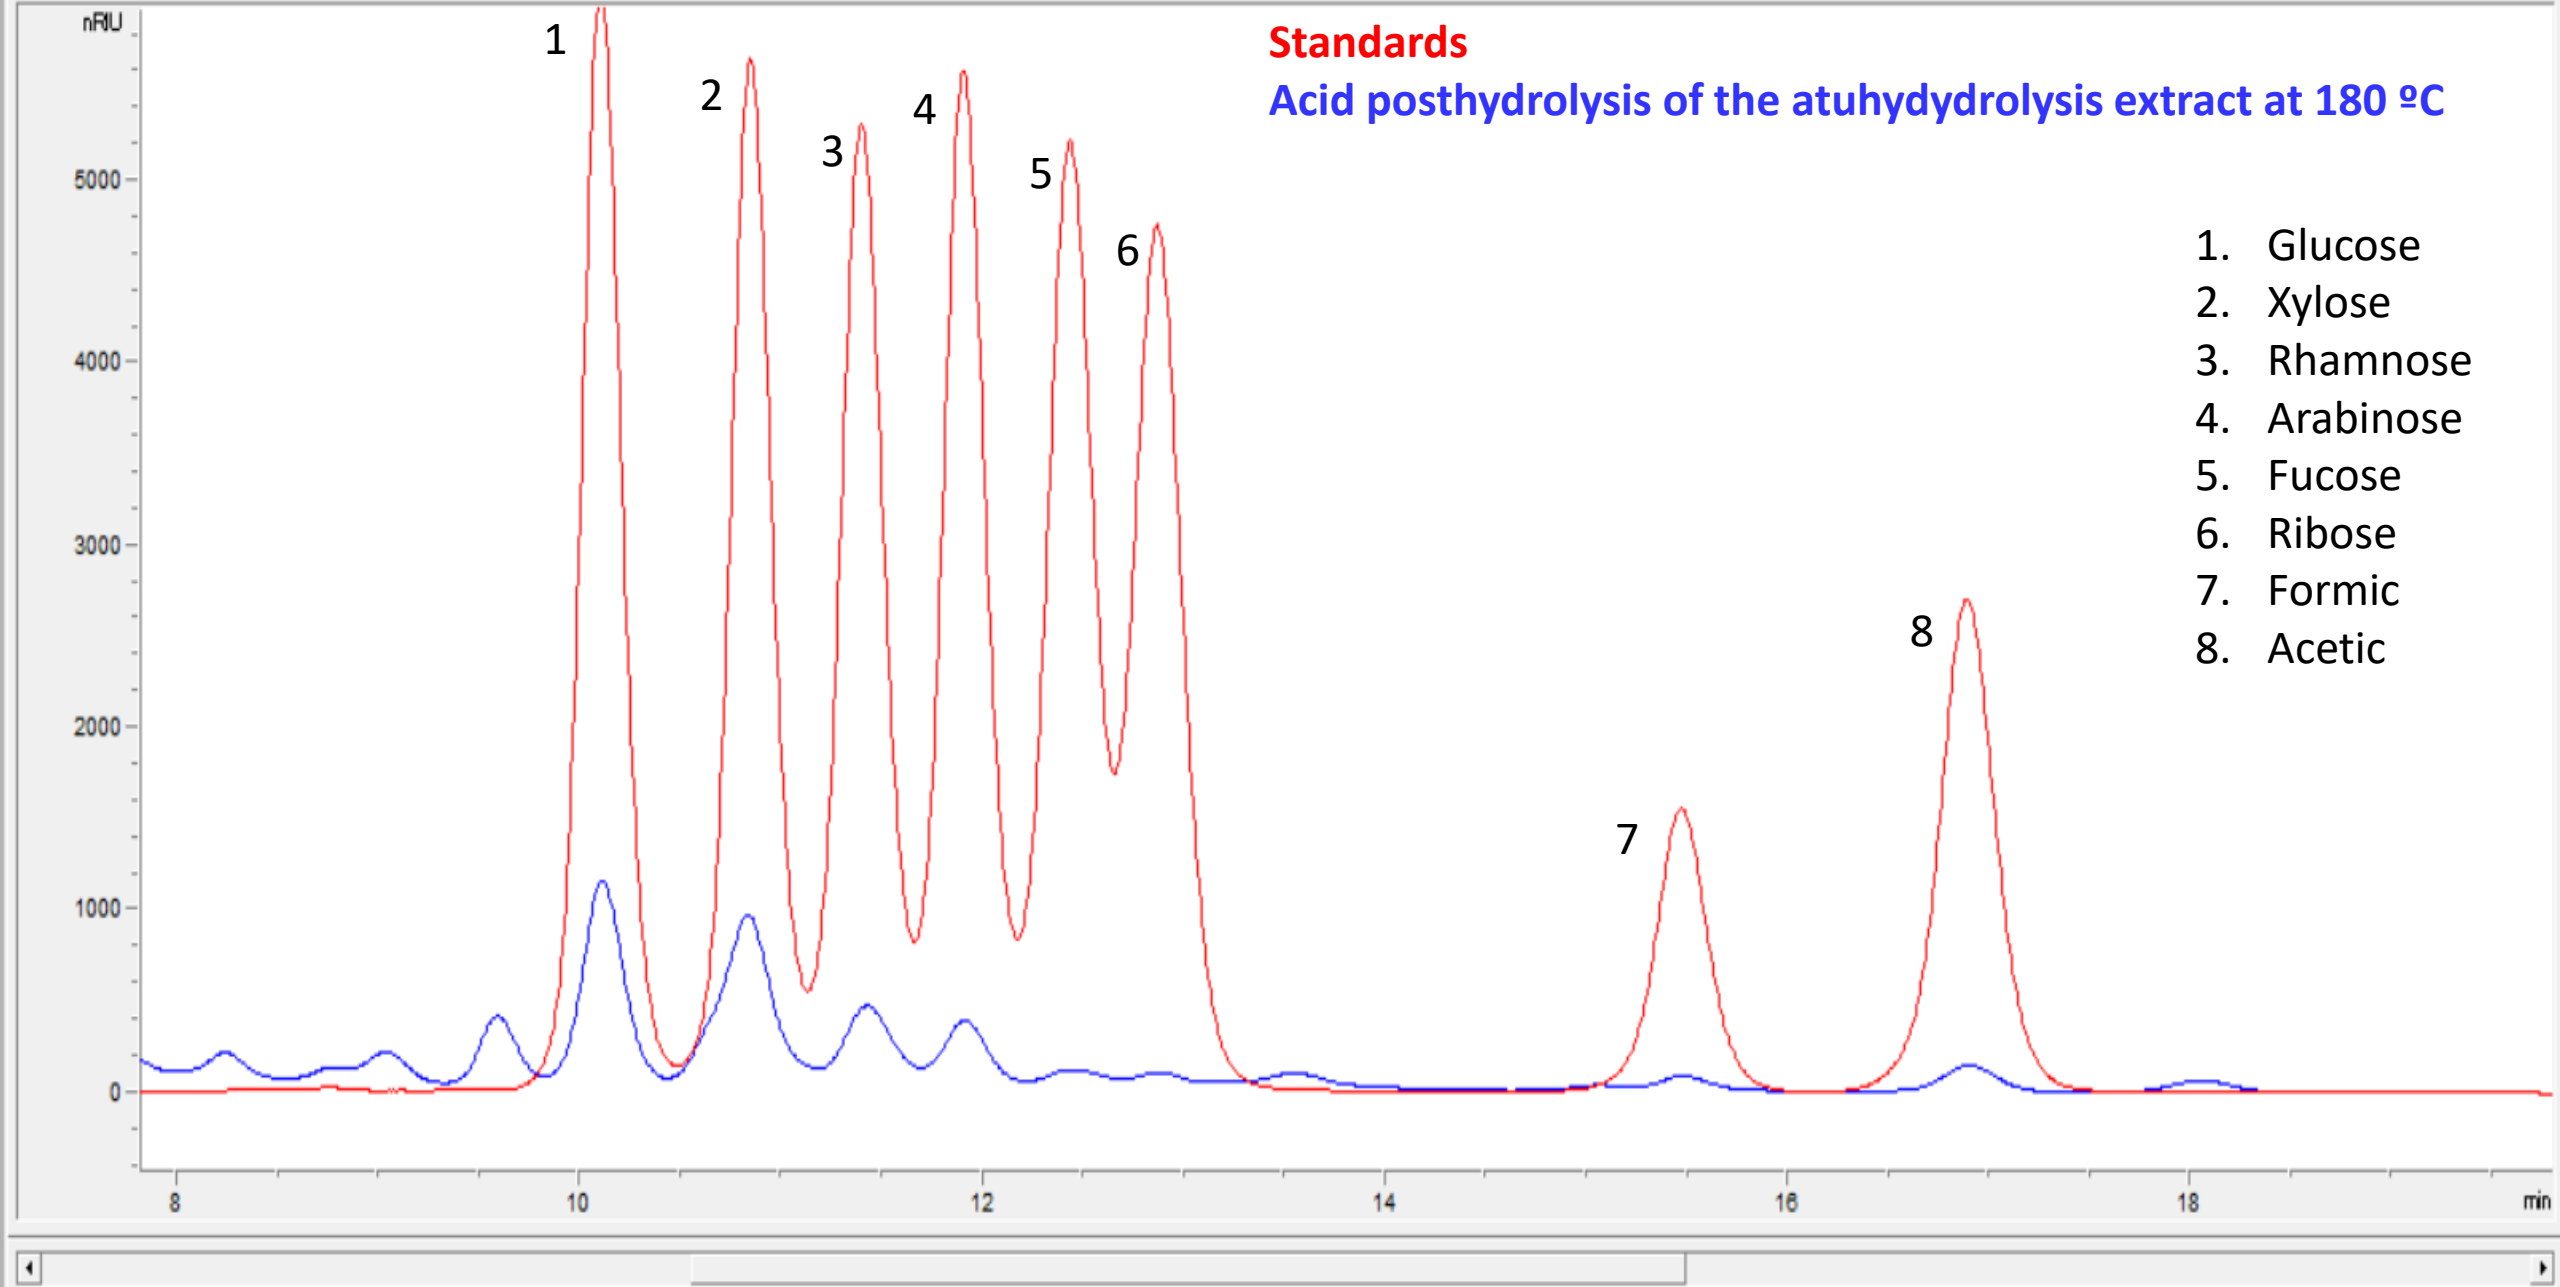

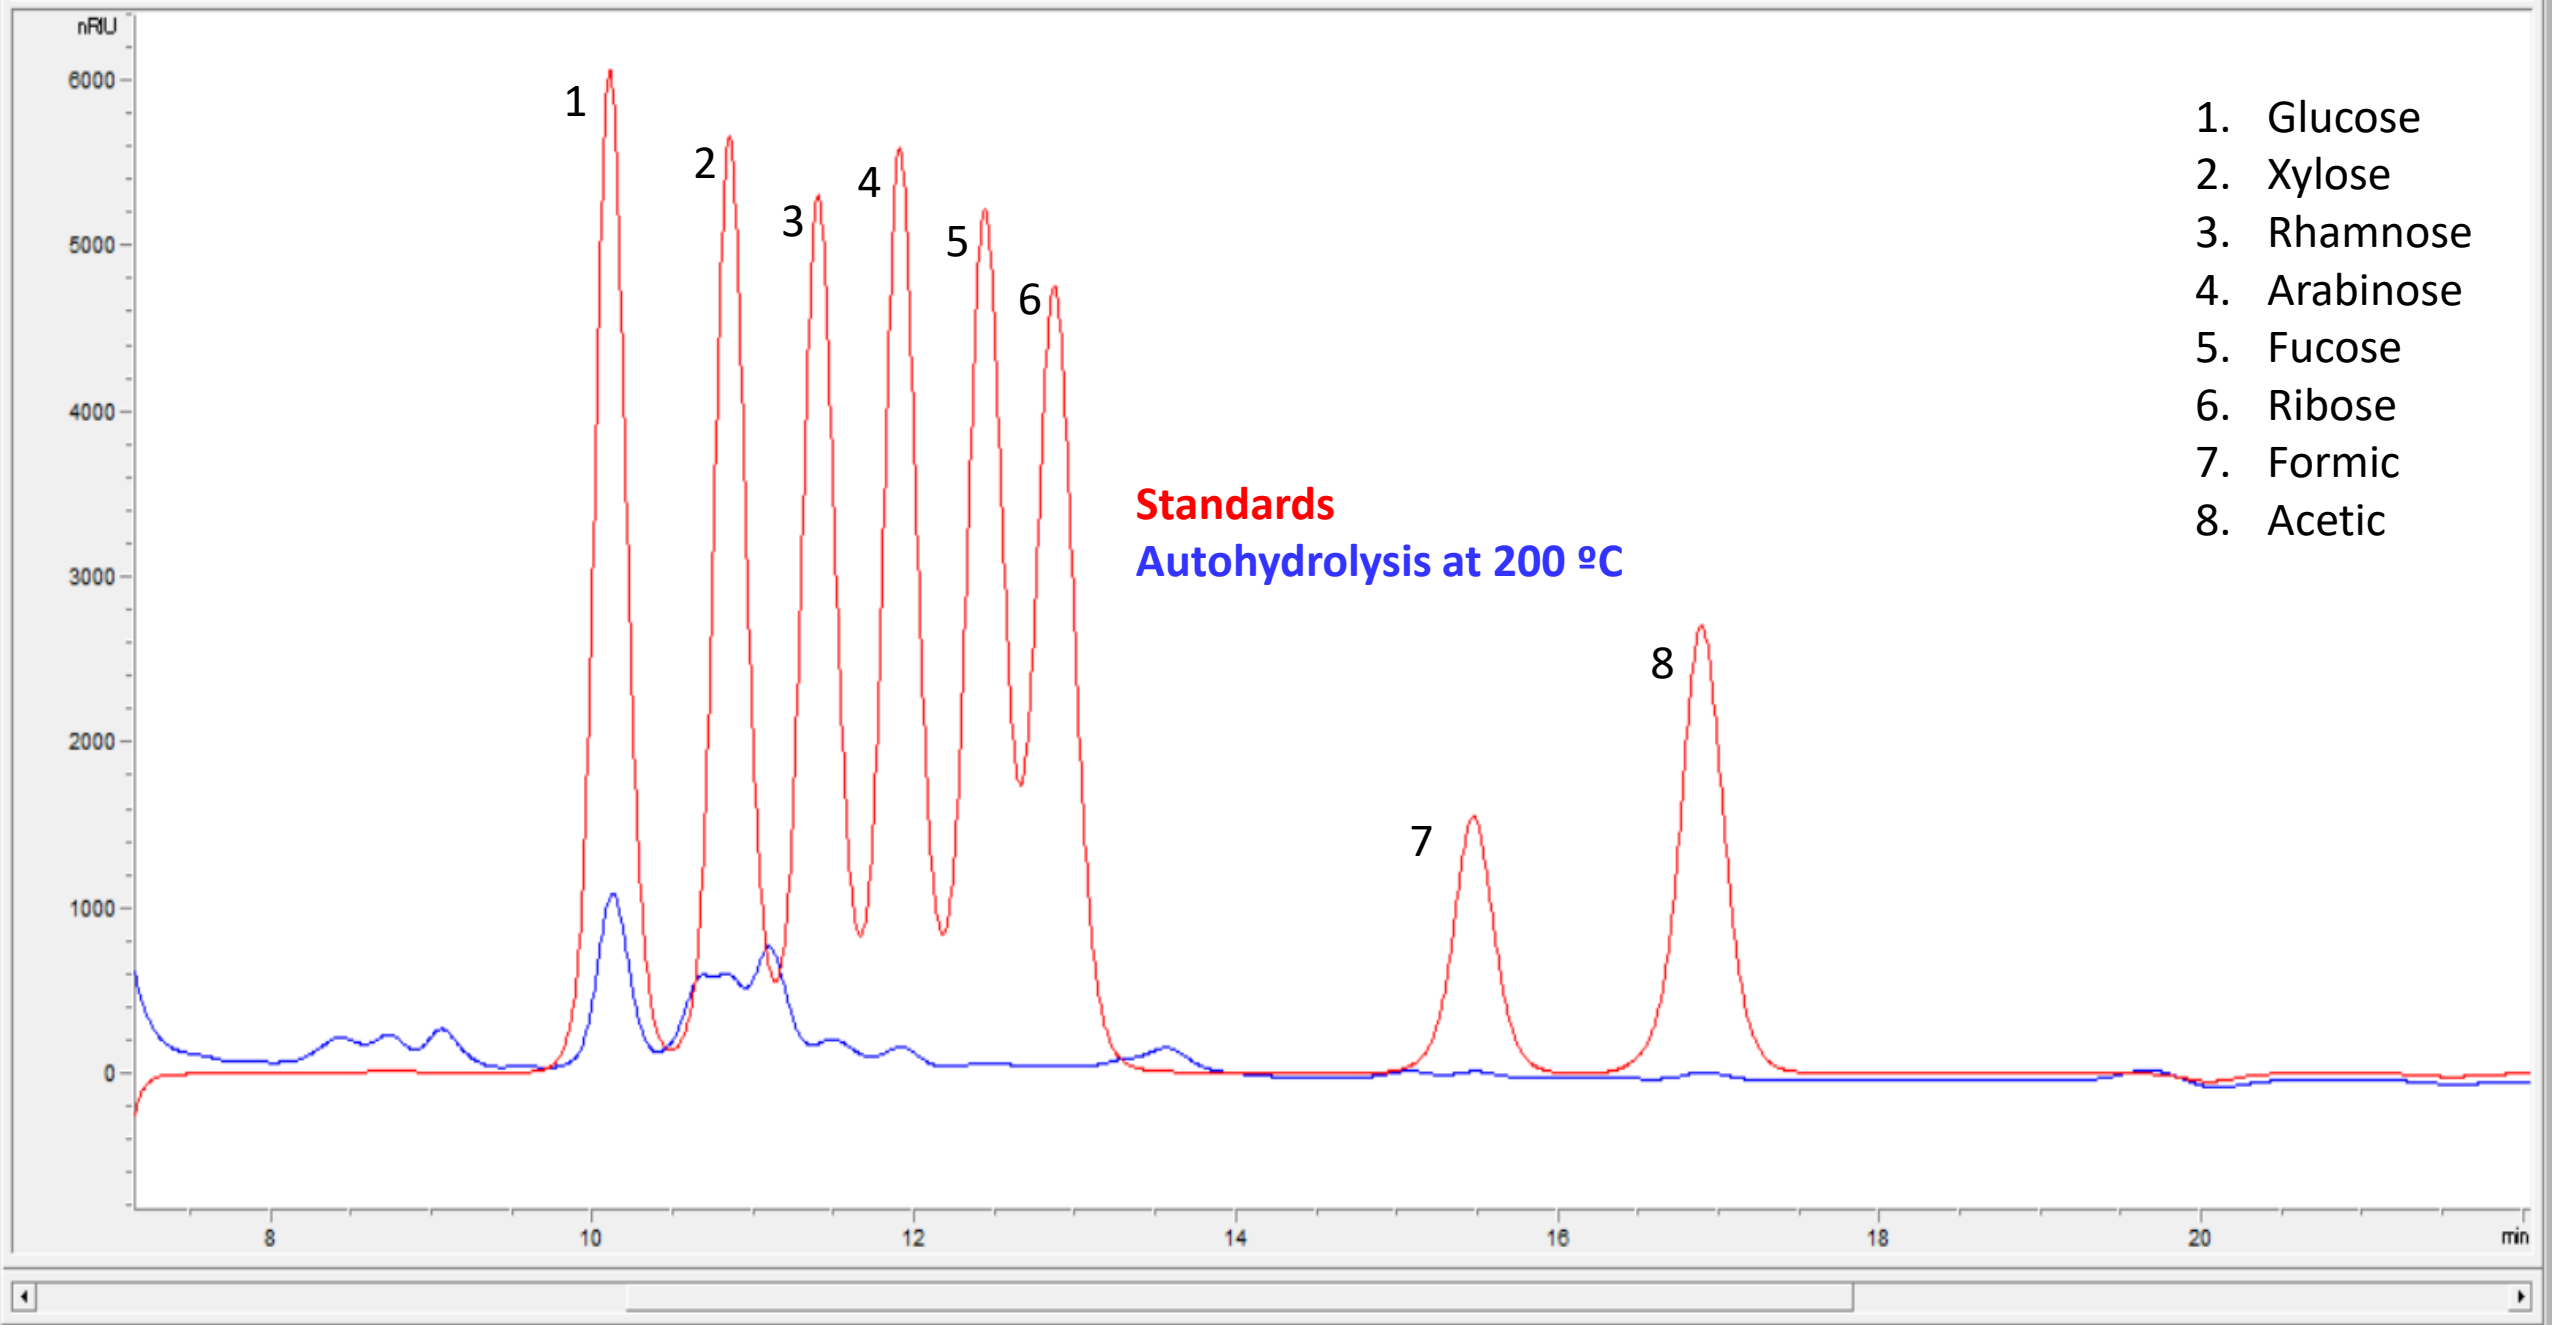

## Standards

Acid posthydrolysis of the extracts at 200 °C

1. Glucose
2. Xylose
3. Rhamnose
4. Arabinose
5. Fucose
6. Ribose
7. Formic
8. Acetic

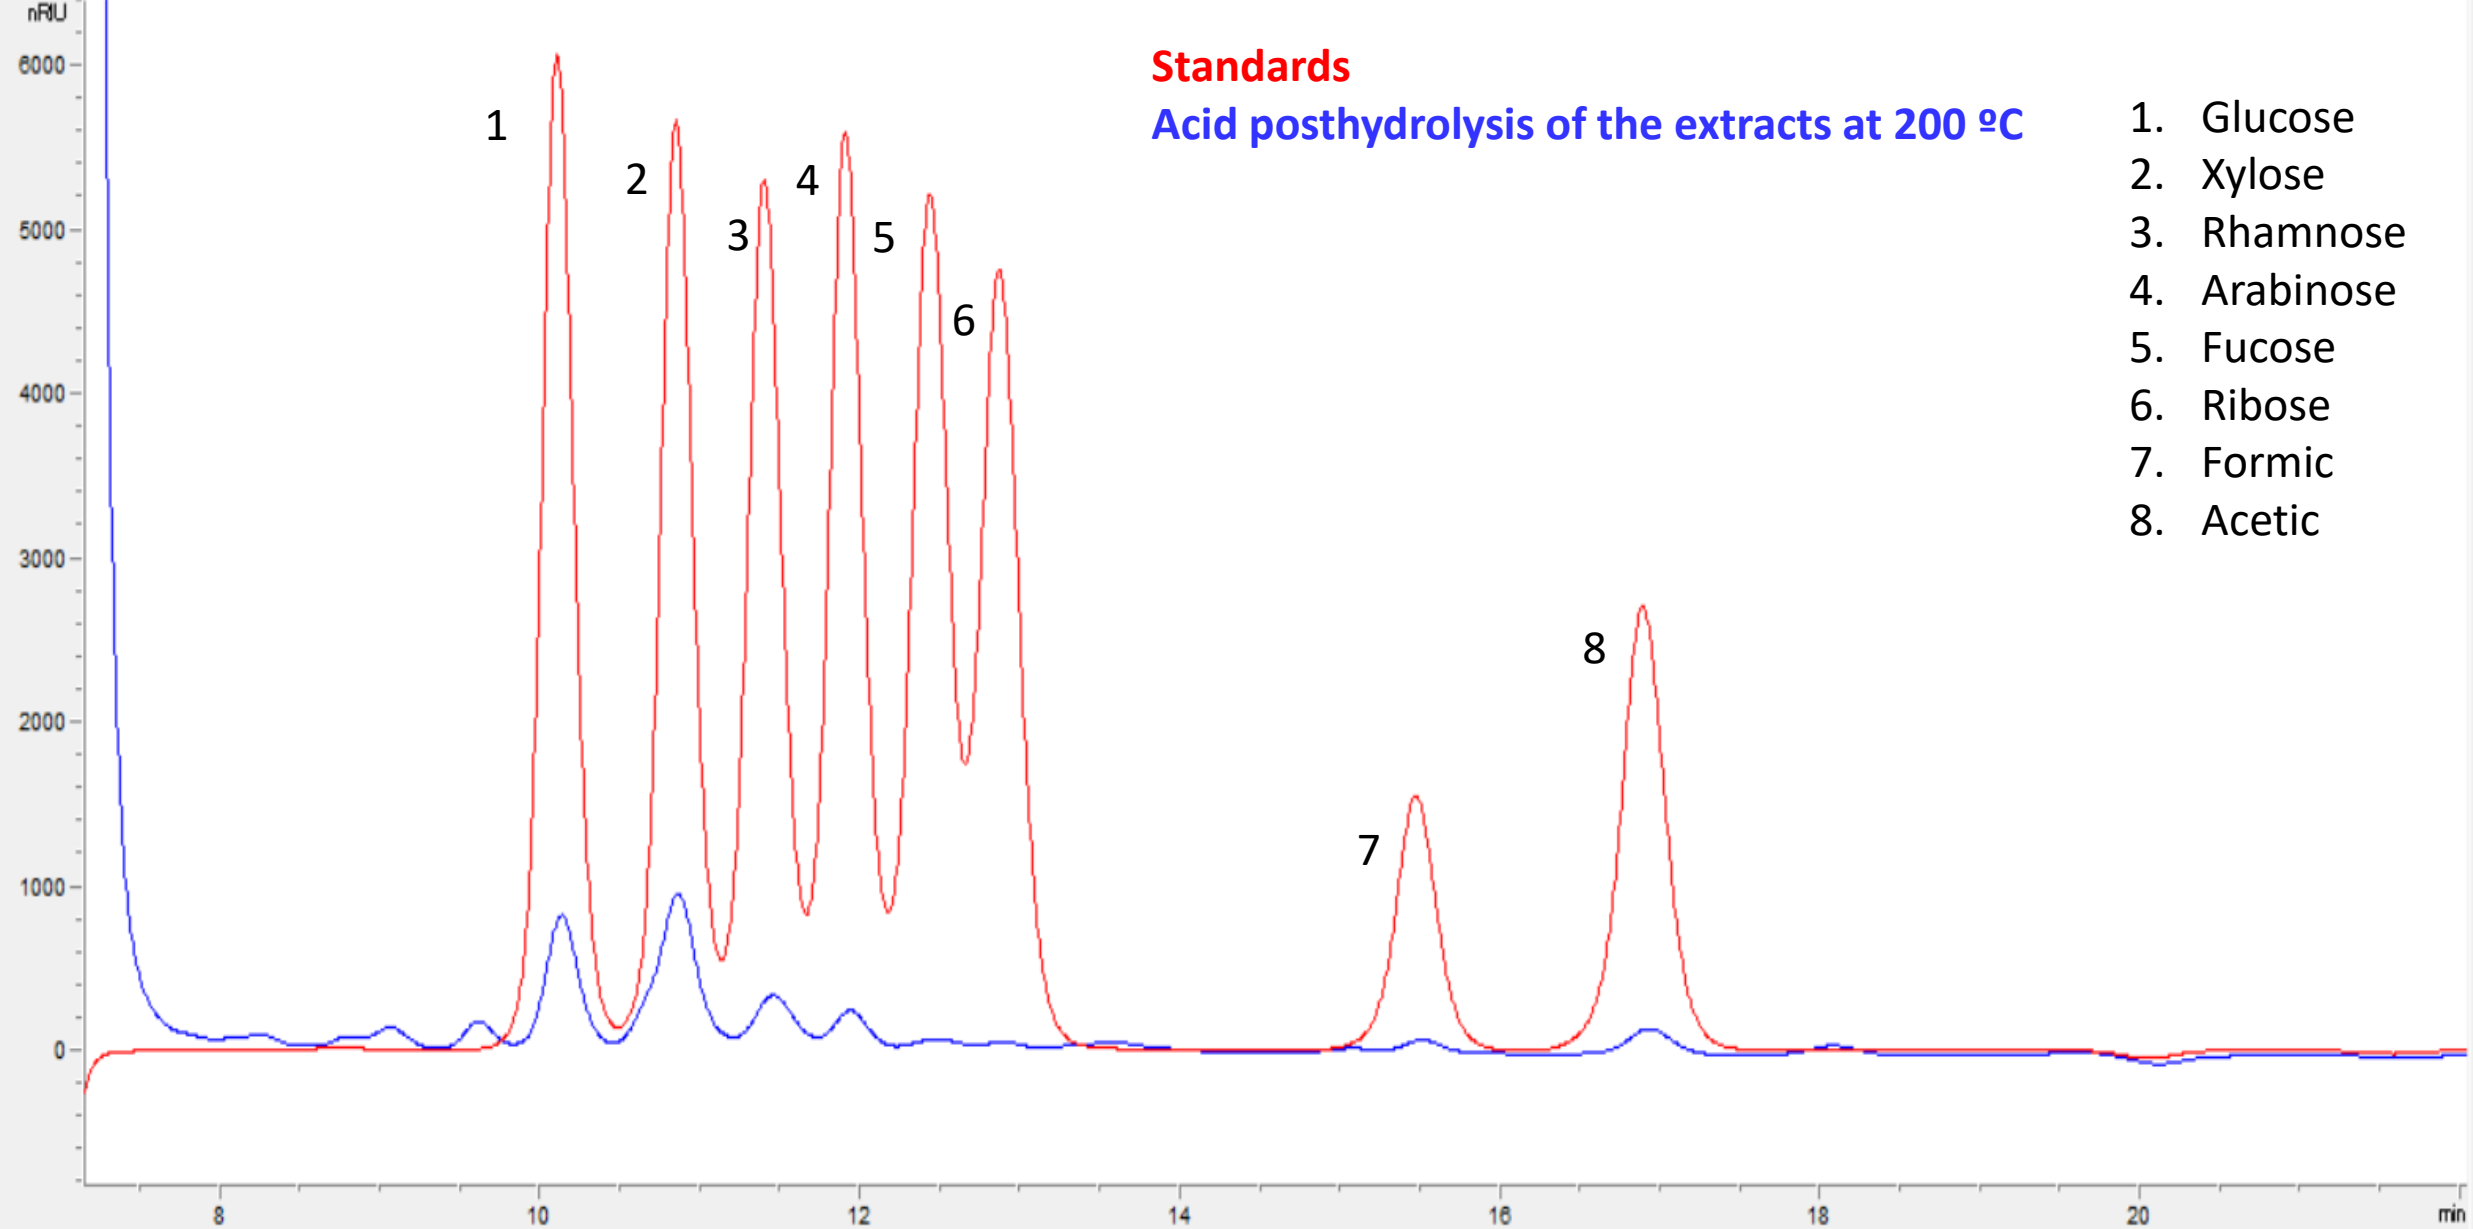

# CALIBRATION

---

1. Glucose  $\longrightarrow y=134452x + 13124 \quad R^2 = 0.9908$
2. Xylose  $\longrightarrow y=128898x + 12564 \quad R^2 = 0.9913$
3. Rhamnose  $\longrightarrow y=127223x + 11459 \quad R^2 = 0.9896$
4. Arabinose  $\longrightarrow y=133726x + 10861 \quad R^2 = 0.9931$
5. Fucose  $\longrightarrow y=138250x + 876.5 \quad R^2 = 0.9954$
6. Ribose  $\longrightarrow y=120921x + 12990 \quad R^2 = 0.9951$
7. Formic  $\longrightarrow y=19834x + 4221.5 \quad R^2 = 0.9947$
8. Acetic  $\longrightarrow y=37937x + 636.1 \quad R^2 = 0.9964$
